1 Article

## 2 Aging-related Changes in Bimanual Coordination As a Screen- 3 ing Tool for Healthy Aging

4 Yusuke Shizuka<sup>1,2</sup>, Shin Murata<sup>1,3</sup>, Akio Goda<sup>4</sup>, Shun Sawai<sup>1,2</sup>, Shoya Fujikawa<sup>1,2</sup>, Ryosuke Yamamoto<sup>1,5</sup>, Taka-  
5 yuki Maru<sup>3,6</sup>, Kotaro Nakagawa<sup>3,7</sup> and Hideki Nakano<sup>1,3,\*</sup>

6 <sup>1</sup> Graduate School of Health Sciences, Kyoto Tachibana University, 34 Yamada-cho, Oyake, Yamashina-ku,  
7 Kyoto-shi 607-8175, Kyoto, Japan; h901124020@st.tachibana-u.ac.jp (Y.S.); murata-s@tachibana-u.ac.jp (S.M.);  
8 h901523005@st.tachibana-u.ac.jp (S.S.); h901123010@st.tachibana-u.ac.jp (S.F.);  
9 h901123013@st.tachibana-u.ac.jp (R.Y.); nakano-h@tachibana-u.ac.jp (H.N.)

10 <sup>2</sup> Department of Rehabilitation, Kyoto Kuno Hospital, 22-500 Honmachi, Higashiyama-ku, Kyoto-shi  
11 605-0981, Kyoto, Japan; maru@tachibana-u.ac.jp (T.M.); nakagawa-k@tachibana-u.ac.jp (K.N.)

12 <sup>3</sup> Department of Physical Therapy, Faculty of Health Sciences, Kyoto Tachibana University, 34 Yamada-cho,  
13 Oyake, Yamashina-ku, Kyoto-shi 607-8175, Kyoto, Japan

14 <sup>4</sup> Department of Physical Therapy, Faculty of Health and Medical Sciences, Hokuriku University, 1-1  
15 Taiyogaoka, Kanazawa-shi 920-1154, Ishikawa, Japan; a-goda@hokuriku-u.ac.jp (A.G.)

16 <sup>5</sup> Department of Rehabilitation, Tesseikai Neurosurgical Hospital, 28-1 Nakanohonmachi, Shijonawate-shi  
17 575-8511, Osaka, Japan

18 <sup>6</sup> Department of Rehabilitation, Junshinkai Kobe Hospital, 868-37 Kozukadai, Tarumi-ku, Kobe-shi 655-0008,  
19 Hyogo, Japan

20 <sup>7</sup> Nagashima Neurosurgery Rehabilitation Clinic, 1st and 2nd floor Niitaka Clinic Center Building, 2-3-2  
21 Niitaka, Yodogawa-ku, Osaka-shi 532-0033, Osaka, Japan

22 \* Correspondence: nakano-h@tachibana-u.ac.jp

23 **Abstract:** The steady increase in the global older adult population highlights critical challenges,  
24 including the development of preventive strategies to extend healthy life expectancy and support  
25 independence in activities of daily living. Although there is an aging-related reduction in manual  
26 dexterity, the difference in bimanual coordination performance between young and older adults  
27 remains unclear. We aimed to elucidate the characteristics of bimanual coordination among young,  
28 young-old, and old-old adults participants. The participants performed in-phase (tapping the  
29 thumb and index finger together as fast as possible) and anti-phase (alternating movement be-  
30 tween the left and right fingers) bimanual coordination tasks, and intergroup comparison of the  
31 task parameters as performed. The number and frequency of taps significantly decreased sequen-  
32 tially in young, young-old, and old-old adults, whereas the average tap interval significantly in-  
33 creased in this order ( $p < 0.05$ ). There was no significant difference between the young-old and  
34 old-old groups in the average local maximum distance ( $p > 0.05$ ). These findings indicate that bi-  
35 manual coordination task performance varies depending on specific parameters. Thus, the number,  
36 average interval, and frequency of taps are potential indicators of aging-related changes in bi-  
37 manual coordination.

38 **Keywords:** bimanual coordination; finger tapping; age-related changes; young adults; young-old  
39 adults; old-old adults

### 41 1. Introduction

42 In recent years, the proportion of older adults in the global population has steadily  
43 increased. The United Nations World Social Report 2023 indicates that the number of  
44 people aged 65 years and above would more than double, from 761 million, in 2021, to 1.6  
45 billion, by 2050. Likewise, the population aged 80 years and above is expected to grow  
46 rapidly. In 2021, one in ten people in the global population was 65 years or older, and by  
47 2050, this could increase to one in six people [1]. Compared with younger adults, older

48 adults tend to experience a decline in physical function. Aging-related deterioration in  
49 motor function significantly contributes to increased caregiver burden, higher hospitaliza-  
50 tion rates, and increasing healthcare costs [2, 3]. Consequently, interest in promoting  
51 healthy aging has been growing. Healthy aging is defined as the process of developing  
52 and maintaining functional abilities that enable wellbeing in older age [4]. Furthermore,  
53 the relationship between healthy aging and physical activity has been underscored with  
54 regard to potential contributions to pain alleviation and prevention of falls, osteoporosis,  
55 sarcopenia, and cognitive impairments [5]. Thus, healthy aging is essential to maintain  
56 the ability to perform activities of daily living (ADL). Therefore, in the global population  
57 wherein the number of older adults is increasing annually, it is crucial to implement  
58 preventive measures to promote healthy aging, extend healthy life expectancy, and  
59 support the ADL independence of older adults.

60 The upper limbs are frequently used in daily life, and older adults perform more  
61 bimanual, than unilateral, tasks [6]. Therefore, maintaining and improving finger func-  
62 tion are crucial for older adults to lead healthy lives. Incel et al. found that grip and pinch  
63 strengths in older adults are associated with activity limitations and quality of life [7].  
64 Moreover, maximal grip strength and motor performance involving coordinated bi-  
65 manual control decrease with age, which suggests that older adults may find it chal-  
66 lenging to perform daily activities that require bimanual movements, such as holding a  
67 bottle while simultaneously unscrewing its cap [8]. Aging-related cognitive decline is a  
68 relevant risk factor [9]. Rattanawan reported that older adults with cognitive impairment  
69 tended to experience a decline in ADL performance owing to reduced manual dexterity  
70 and impaired bimanual coordination [10]. Therefore, finger function plays a vital role in  
71 ADL performance, with a particularly strong correlation between bimanual tasks and  
72 daily activity levels in older adults. Thus, to promote healthy aging and support inde-  
73 pendence in older adults, it is essential to appropriately assess finger function during  
74 bimanual movements and undertake preventive interventions to prevent aging-related  
75 decline.

76 A meta-analysis investigating aging-related changes in bimanual movement among  
77 older adults revealed a decline in accuracy, increased variability, and prolonged execu-  
78 tion times for bimanual coordination [11]. Another meta-analysis investigating the char-  
79 acteristics of bimanual coordination in older adults found that motor performance dete-  
80 rioration was more pronounced in asymmetrical, rather than in symmetrical, bimanual  
81 tasks [12]. Thus, it has been clarified that bimanual coordination performance in older  
82 adults declines in comparison to that in young adults. Furthermore, both young-old  
83 adults and old-old adults exhibit reduced bimanual performance compared to younger  
84 adults [13, 14]. Asymmetrical bimanual coordination performance is lower in young  
85 adults than in older adults, with performance decline particularly pronounced in tasks  
86 that require higher movement speeds [13]. The accuracy of both symmetrical and  
87 asymmetrical bimanual force control is lower in old-old adults, compared to young  
88 adults [14]. Therefore, bimanual coordination performance, which plays a crucial role in  
89 daily activities, decreases in both young-old and old-old adults as compared to that in  
90 young adults. Typically, old-old adults experience more pronounced decline in physical  
91 and cognitive functions than young adults [15-17]. Therefore, although aging-related  
92 changes in bimanual coordination may occur in young-old and old-old adults, the dif-  
93 ferences in bimanual coordination performance between young-old and old-old adults  
94 remain unclear.

95 We aimed to clarify the age-specific characteristics of bimanual coordination in  
96 young, young-old, and old-old adults. The research hypothesis was that bimanual coor-  
97 dination performance would be lower in older adults than in young adults, and that  
98 among older adults, the decline in performance would be more pronounced in old-old  
99 adults than in young-old adults. If the age-specific characteristics of bimanual coordina-  
100 tion can be clarified, these tasks can be applied as screening tools for health management  
101 and promotion among older adults. Moreover, early detection and intervention for the

102 decline in ADL among older adults could contribute to promoting healthy aging and  
103 extending their health span.

## 104 2. Materials and Methods

### 105 2.1. Materials

106 Participants included 107 healthy younger adults and 364 healthy older adults. The  
107 exclusion criteria were as follows: (i) older adults under 65 years; (ii) older adults with  
108 suspected cognitive impairment based on a Mini-Mental State Examination (MMSE)  
109 score of 23 or less [18]; (iii) participants with musculoskeletal, central nervous system, or  
110 mental disorders that may have affected the study results; (iv) left-handed participants;  
111 and (v) participants whose maximum amplitude of distance was 300 mm or more in bi-  
112 manual coordination measurements [19], (vi) Participants who could not complete all  
113 measurements correctly. After excluding the participants who met the exclusion criteria,  
114 97 healthy younger adults and 324 healthy older adults were included in the analysis  
115 (Figure 1). Additionally, participants were categorized into three groups: young adults  
116 (18–22 years), young-old adults (65–74 years), and old-old adults ( $\geq 75$  years) [20].

### 117 2.2. Ethics statement

118 This study was conducted in accordance with the principles of Declaration of Hel-  
119 sinki and approved by the Research Ethics Committee of Kyoto Tachibana University  
120 (approval number: 24-52, approval date: November 12, 2024). Informed consent was ob-  
121 tained from all the participants. The study was registered in the UMIN Clinical Trials  
122 Registry (UMIN000056499).

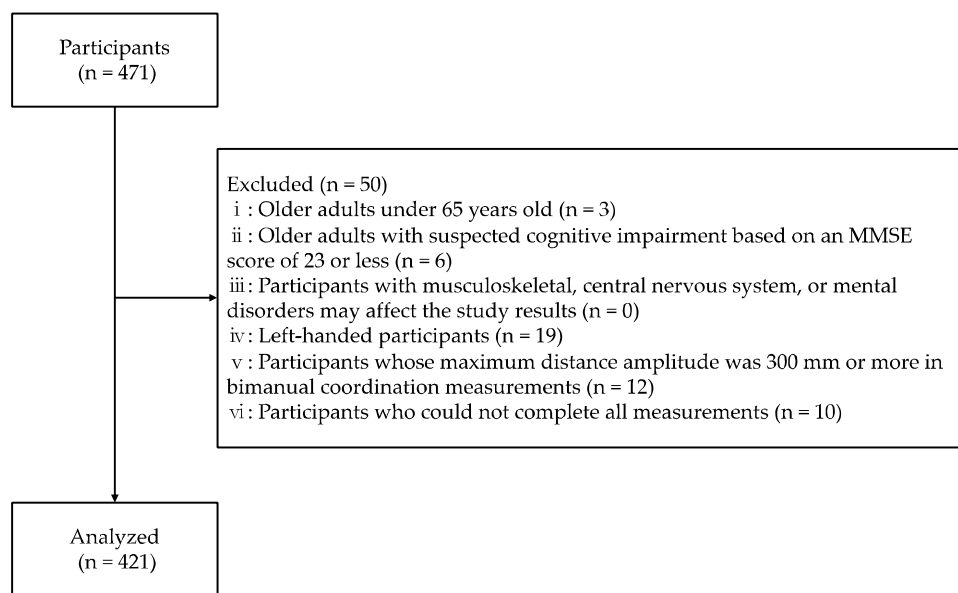

123  
124 **Figure 1.** Flowchart of participation criteria. MMSE: Mini-Mental State Examination.

### 125 2.3. Methods

126 All the participants performed a bimanual coordination task involving opposition  
127 movements of the thumb and index finger [21] in two tasks: the in-phase task, where  
128 tapping movements of the thumb and index finger were performed simultaneously and  
129 as quickly as possible with both hands; and the anti-phase task, where tapping move-  
130 ments were alternated between the left and right hands [22] (Figure 2), wherein partici-  
131 pants sat on chairs with backrests and placed their forearms on the platform. During each  
132 task, the forearms were positioned in a neutral rotation, with the third, fourth, and fifth

133 fingers slightly flexed, and measurements were taken with the eyes closed (Figure 3). We  
134 instructed the participants to “perform as fast as possible and in the same rhythm.” The  
135 tasks were performed in sequence, starting with the in-phase task and followed by the  
136 anti-phase task. Each task was conducted for 15 s, and a 15-s pre-practice session was  
137 provided before each task.

138

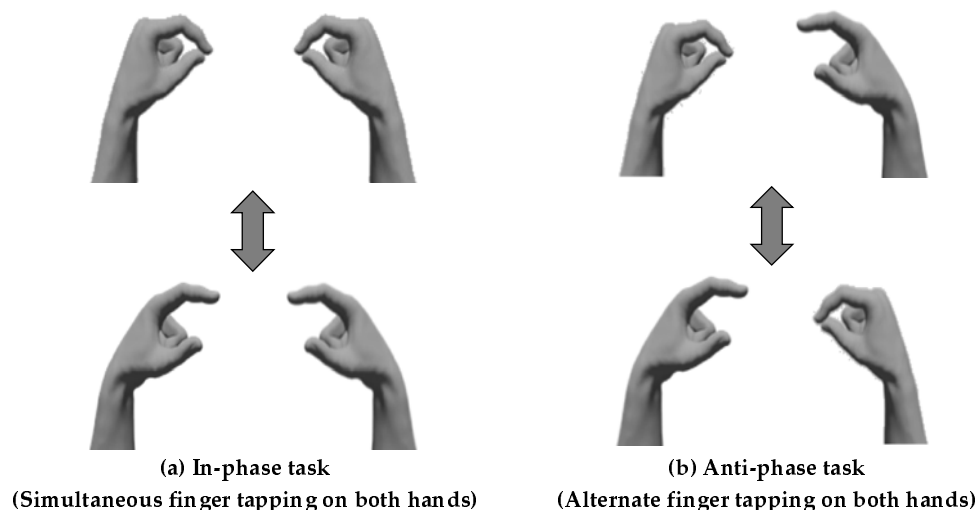

139 **Figure 2.** Bimanual coordination task. (a) In-phase task: Participants performed tapping move-  
140 ments of the thumb and index finger simultaneously on both sides. (b) Anti-phase task: Partici-  
141 pants performed tapping movements of the thumb and index finger alternately on both sides.

142

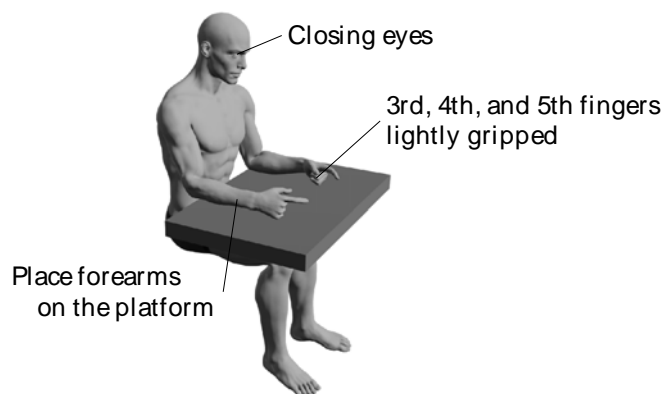

143

144 **Figure 3.** Measurement position of the bimanual coordination task. Participants sat on chairs with  
145 backrests and placed their forearms on the platform. During each task, the forearms were posi-  
146 tioned in a neutral rotation, with the third, fourth, and fifth fingers slightly flexed, and measure-  
147 ments were taken with the participants sitting with eyes closed.

148 Bimanual coordination performance was measured using a magnetic sensor fin-  
149 ger-tapping device (UB-2, Maxell Ltd. Tokyo, Japan) [21]. Magnetic sensors were at-  
150 tached to the dorsal side of the participant's thumb and index finger with a rubber band  
151 and the distance from the strength of the magnetic field generated between the two fin-  
152 gers. This device was highly reproducible and reliable across periods, devices, and  
153 measurement examiners [23]. In this study, the participants were instructed to open their  
154 fingers to a width of 40 mm to minimize amplitude variation, and both pre-practice and  
155 measurements were conducted [24]. The features of bimanual coordination were ob-

156 tained from the recorded data [22] (Table 1), which yielded four parameters for evalu-  
 157 ating the distance and movement amplitude of the thumb and index fingers during the  
 158 task. Tap interval-related parameters yielded four parameters for evaluating the average  
 159 speed of movement and variability of tapping. The phase difference-related parameters  
 160 yielded one parameter to evaluate the timing discrepancy of tapping between the hands.  
 161 For each parameter, larger values of the total traveling distance, average local maximum  
 162 distance, number of taps, and frequency of taps indicated better bimanual coordination  
 163 performance. Conversely, smaller values for the standard deviation of the local maxi-  
 164 mum distance, slope of the approximate line of local maximum points, average of tap  
 165 intervals, standard deviation of the inter-tap interval, and standard deviation of the  
 166 phase difference indicate better performance for bimanual coordination. We instructed  
 167 the participants to open their fingers to a width of 40 mm. Therefore, the closer the mean  
 168 of the average of the local maximum distance is to 40 mm, the better the performance of  
 169 bimanual coordination.

170

171 **Table 1.** Characteristics of the bimanual coordination task

|                  | Parameter                                            | Description                                                                                                                                                                                                                                                  |
|------------------|------------------------------------------------------|--------------------------------------------------------------------------------------------------------------------------------------------------------------------------------------------------------------------------------------------------------------|
| Distance         | Total travel distance (mm)                           | The sum of the distances moved by the thumb and index finger.<br>The overall amount of movement.                                                                                                                                                             |
|                  | Ave of local max distance (mm)                       | Average amplitude of the distance waveform.                                                                                                                                                                                                                  |
|                  | SD of local max distance (mm)                        | Variation in the amplitude of the distance waveform.                                                                                                                                                                                                         |
|                  | Slope of approximate line of local max points (mm/s) | The slope is a linear regression of the relationship between the maximum point of each tap and time.<br>As the tap amplitude decreases due to fatigue, the slope increases in the negative direction.<br>When there is no effect of fatigue, the slope is 0. |
| Tap interval     | Number of taps                                       | Number of taps during the measurement time.                                                                                                                                                                                                                  |
|                  | Ave of tap intervals (s)                             | Average in time difference between two consecutive taps.                                                                                                                                                                                                     |
|                  | Frequency of taps (Hz)                               | Inverse to the mean of the tap interval.                                                                                                                                                                                                                     |
|                  | SD of inter-tap interval (s)                         | Variations in time difference between two consecutive taps.                                                                                                                                                                                                  |
| Phase difference | SD of phase difference (degree)                      | Assuming the interval between one tap is 360°, the time lag between the left and right hands is expressed as an angle.<br>This parameter is the variation of its value.                                                                                      |

172 Max: Maximum; Ave: Average; SD: Standard deviation; S: Second; Phase difference: phase differ-  
 173 ence between the left and right taps.

174 **2. 4. Statistical Analysis**

175 First, a chi-square test was conducted to compare the male/female ratios among the  
 176 young, young-old, and old-old adults. Next, a three-way ANOVA with a mixed design  
 177 was conducted to compare the parameters related to the distance and tap interval, con-  
 178 sidering the factors of the hand (left, right), task (in-phase task, anti-phase task), and  
 179 group (young, young-old, and old-old adults). A two-way mixed-design ANOVA was  
 180 used to compare the parameters related to the phase difference, considering task  
 181 (in-phase task, anti-phase task) and group (young, young-old, and old-old adults) factors.  
 182 Bonferroni post-hoc tests were performed for parameters with significant interactions or  
 183 main effects using ANOVA. SPSS version 29.0 (IBM Corp., Armonk, NY, USA) was used  
 184 for the statistical analysis, with the significance level set at 5%.

185

### 3. Results

186

#### 3.1. Basic Information of Participants

187

The 421 participants were divided into groups based on age: 97 young adults (male: 25, female: 72, age:  $20.73 \pm 1.43$  years), 102 young-old adults (male: 17, female: 85, age:  $70.77 \pm 2.70$  years), and 222 old-old adults (male: 52, female: 170, age:  $80.71 \pm 4.38$  years). The results of the chi-square test showed no significant differences between male and female ratios among the young, young-old, and old-old adult groups ( $p > 0.05$ ).

188

189

190

191

192

#### 3.2. Comparison of the Distance Parameters

193

The statistical analysis revealed no significant three-way interaction (hand  $\times$  task  $\times$  group) for any distance parameter ( $p > 0.05$ ; Table 2). The total traveling distance showed significant interactions between the hand  $\times$  group and task  $\times$  group factors ( $p < 0.05$ ), and the total traveling distance had a significant effect on the task factor ( $p < 0.05$ ). Post-hoc test results indicated that the total traveling distance in the old-old adult group was significantly lower for the left hand than for the right hand ( $p < 0.05$ ). Moreover, the total traveling distance was significantly greater during the in-phase task than during the anti-phase task for the young, young-old, and old-old adult groups ( $p < 0.05$ ). The total traveling distance in the anti-phase task was significantly lower in the old-old adult group than in the young and young-old adult groups ( $p < 0.05$ ).

194

195

196

197

198

199

200

201

202

203

The average local maximum distance showed a significant interaction for the task  $\times$  group factor ( $p < 0.05$ ). The average local maximum distance showed significant main effects for both task and group factors ( $p < 0.05$ ). The results of post-hoc tests indicated that the average local maximum distance was significantly greater during the anti-phase task than during the in-phase task for the young, young-old, and old-old adult groups ( $p < 0.05$ ). Furthermore, the average local maximum distance was significantly higher in the young-old and old-old groups than in the young adult group during the in-phase and anti-phase tasks ( $p < 0.05$ ).

204

205

206

207

208

209

210

211

The standard deviation of the local maximum distance showed significant interactions for both hand  $\times$  group and task  $\times$  group factors ( $p < 0.05$ ). Moreover, the standard deviation of the local maximum distance showed significant main effects for hand, task, and group factors ( $p < 0.05$ ). The results of post-hoc tests indicated that the standard deviation of the local maximum distance was significantly higher for the left hand than for the right hand in the young, young-old, and old-old adult groups ( $p < 0.05$ ), and the standard deviations were significantly greater in the anti-phase task than in the in-phase task ( $p < 0.05$ ). Furthermore, the standard deviation of the local maximum distance for the right hand was significantly higher in the young-old and old-old adult groups than in the young adult group. The standard deviation of the local maximum distance in the anti-phase task was significantly higher in the old-old adult group than in the young adult group ( $p < 0.05$ ).

212

213

214

215

216

217

218

219

220

221

222

The slope of the approximate line of the local maximum points showed a significant interaction for the hand  $\times$  task factor ( $p < 0.05$ ). Additionally, the slope of the approximate line of the local maximum points showed significant main effects for both hand and task factors ( $p < 0.05$ ). Post-hoc tests indicated that the slope of the approximate line of local maximum points in the in-phase task for the left hand was significantly lower than that for the right hand ( $p < 0.05$ ). Furthermore, the slope of the approximate line of the local maximum points for the right hand was significantly lower in the anti-phase task than that in the in-phase task ( $p < 0.05$ ).

223

224

225

226

227

228

229

230

231

#### 3.3. Comparison of the Tap Interval Parameters

Statistical analysis revealed no significant three-way interaction (hand  $\times$  task  $\times$  group) for any of the tap-interval parameters ( $p > 0.05$ ; Table 2).

232

233

234 The number of taps showed a significant interaction effect between task and group  
235 factors ( $p < 0.05$ ). The number of taps showed significant main effects for the hand, task,  
236 and group factors ( $p < 0.05$ ). Post-hoc analysis indicated that the number of taps was sig-  
237 nificantly lower for the left hand than for the right hand ( $p < 0.05$ ). Furthermore, the  
238 number of taps in the young, young-old, and old-old adult groups was significantly  
239 lower in the anti-phase task than in the in-phase task ( $p < 0.05$ ). Finally, the number of  
240 taps in both the in-phase and anti-phase tasks decreased significantly in the following  
241 order: young adults, young-old adults, and old-old adults ( $p < 0.05$ ).

242 The average tap intervals showed a significant interaction effect between the task  
243 and group factors ( $p < 0.05$ ). Additionally, the average tap intervals showed significant  
244 main effects for hand, task, and group factors ( $p < 0.05$ ). Post-hoc test results indicated  
245 that the average tap interval was significantly longer for the left hand than for the right  
246 hand ( $p < 0.05$ ). Moreover, the average tap intervals in the young, young-old, and old-old  
247 adult groups were significantly longer in the anti-phase task than in the in-phase task ( $p <$   
248  $0.05$ ). Finally, the average tap intervals in both the in-phase and anti-phase tasks signifi-  
249 cantly increased in the following order: young adults, young-old adults, and old-old  
250 adults ( $p < 0.05$ ).

251 The frequency of taps showed a significant interaction effect between task and  
252 group factors ( $p < 0.05$ ). Additionally, the frequency of taps showed significant main ef-  
253 fects for hand, task, and group factors ( $p < 0.05$ ). Post-hoc analysis test results indicated  
254 that the frequency of tapping was significantly lower in the left hand than in the right hand  
255 ( $p < 0.05$ ). Furthermore, the frequency of taps in the young, young-old, and old-old adult  
256 groups was significantly lower in the anti-phase task than in the in-phase task ( $p < 0.05$ ).  
257 Lastly, the frequency of taps in both the in-phase and anti-phase tasks decreased signifi-  
258 cantly in the following order: young adults, young-old adults, and old-old adults ( $p <$   
259  $0.05$ ).

260 The standard deviation of the intertap intervals showed significant interaction ef-  
261 fects for the task  $\times$  group and hand  $\times$  task factors ( $p < 0.05$ ). Additionally, the standard  
262 deviation of the inter-tap intervals showed significant main effects for hand, task, and  
263 group factors ( $p < 0.05$ ). Post-hoc test results indicated that the standard deviation of in-  
264 ter-tap intervals was significantly higher for the left hand than for the right hand in both  
265 the in-phase and anti-phase tasks ( $p < 0.05$ ). Moreover, the standard deviation of the in-  
266 ter-tap intervals in the young-old and old-old groups was significantly higher in the an-  
267 ti-phase task than in the in-phase task for both hands ( $p < 0.05$ ). Finally, the standard de-  
268 viation of inter-tap intervals in the in-phase task was higher in the young-old adult group  
269 and the old-old adult group than in the young adult group, whereas it significantly in-  
270 creased in the order of young adults, young-old adults, and old-old adults in the an-  
271 ti-phase task ( $p < 0.05$ ).

### 272 3. 4. Comparison of the Phase Difference Parameters

273 The standard deviation of the phase difference showed a significant interaction ef-  
274 fect for the task  $\times$  group ( $p < 0.05$ ). Additionally, the standard deviation of the phase dif-  
275 ference showed significant main effects for both task and group factors ( $p < 0.05$ ). The  
276 Post-hoc test results indicated that the standard deviation of the phase difference for the  
277 young-old and old-old adult groups was significantly higher in the anti-phase task than  
278 in the in-phase task ( $p < 0.05$ ). The standard deviation of the phase difference in the an-  
279 ti-phase task increased significantly in the following order: young adults, young-old  
280 adults, and old-old adults ( $p < 0.05$ ; Table 3).

**Table 2.** Comparison of In-phase and Anti-phase tasks and Left and Right hands at Distance and Tap interval

| Task                                                 | Hand | YA<br>(n = 97) | YOA<br>(n = 102) | OOA<br>(n = 222) | IE                 | IE                 | IE                | IE                              | ME   | ME      | ME       | Post-hoc test |                                          |                                             |                                                                  |
|------------------------------------------------------|------|----------------|------------------|------------------|--------------------|--------------------|-------------------|---------------------------------|------|---------|----------|---------------|------------------------------------------|---------------------------------------------|------------------------------------------------------------------|
|                                                      |      |                |                  |                  | Hand<br>×<br>Group | Task<br>×<br>Group | Hand<br>×<br>Task | Hand<br>×<br>Group<br>×<br>Task | Hand | Task    | Group    | Hand          | Task                                     | Group                                       |                                                                  |
|                                                      |      |                |                  |                  | F                  | F                  | F                 | F                               | F    | F       | F        | Hand          | Task                                     | Group                                       |                                                                  |
| Total traveling distance (mm)                        | IP   | L              | 4323.67          | 4498.38          | 4178.93            | 3.31*              | 5.36**            | 0.22                            | 0.09 | 0.90    | 127.97** | 2.78          | OOA:<br>L < R <sup>a</sup>               | YA, YOA,<br>OOA:<br>AP < IP <sup>a</sup>    | AP:<br>OOA <<br>YOA, YA <sup>a</sup>                             |
|                                                      |      |                | R                | 4242.82          | 4568.94            | 4332.58            |                   |                                 |      |         |          |               |                                          |                                             |                                                                  |
|                                                      | AP   | L              | 4001.68          | 3845.86          | 3471.61            |                    |                   |                                 |      |         |          |               |                                          |                                             |                                                                  |
|                                                      |      | R              | 3883.48          | 3923.39          | 3595.16            |                    |                   |                                 |      |         |          |               |                                          |                                             |                                                                  |
| Ave of local max distance (mm)                       | IP   | L              | 41.07            | 46.81            | 48.11              | 1.71               | 10.10**           | 1.25                            | 0.82 | 0.32    | 354.23** | 24.23**       | YA, YOA,<br>OOA:<br>IP < AP <sup>a</sup> | IP, AP:<br>YA <<br>YOA,<br>OOA <sup>a</sup> |                                                                  |
|                                                      |      |                | R                | 40.25            | 47.01              | 48.78              |                   |                                 |      |         |          |               |                                          |                                             |                                                                  |
|                                                      | AP   | L              | 49.50            | 60.55            | 62.22              |                    |                   |                                 |      |         |          |               |                                          |                                             |                                                                  |
|                                                      |      | R              | 47.39            | 59.90            | 63.15              |                    |                   |                                 |      |         |          |               |                                          |                                             |                                                                  |
| SD of local max distance (mm)                        | IP   | L              | 6.95             | 6.71             | 6.63               | 5.18**             | 8.50**            | 2.96                            | 1.13 | 98.92** | 44.38**  | 3.91*         | YA, YOA,<br>OOA:<br>R < L <sup>a</sup>   | YOA, OOA:<br>IP < AP <sup>a</sup>           | R: YA<br>< YOA, OOA <sup>a</sup><br>AP: YA<br>< OOA <sup>a</sup> |
|                                                      |      |                | R                | 5.26             | 5.55               | 5.70               |                   |                                 |      |         |          |               |                                          |                                             |                                                                  |
|                                                      | AP   | L              | 7.06             | 7.36             | 7.90               |                    |                   |                                 |      |         |          |               |                                          |                                             |                                                                  |
|                                                      |      | R              | 5.45             | 6.87             | 7.09               |                    |                   |                                 |      |         |          |               |                                          |                                             |                                                                  |
| Slope of approximate line of local max points (mm/s) | IP   | L              | -0.14            | -0.14            | -0.09              | 1.23               | 0.45              | 4.03*                           | 1.70 | 10.56** | 6.82**   | 0.63          | IP:<br>L < R <sup>a</sup>                | R: AP < IP <sup>a</sup>                     |                                                                  |
|                                                      |      | R              | -0.08            | 0.11             | 0.03               |                    |                   |                                 |      |         |          |               |                                          |                                             |                                                                  |
|                                                      | AP   | L              | -0.21            | -0.15            | -0.15              |                    |                   |                                 |      |         |          |               |                                          |                                             |                                                                  |



|                                  |    |   |         |         |         |      |         |        |      |         |          |         |  |                            |                                    |                                     |  |  |
|----------------------------------|----|---|---------|---------|---------|------|---------|--------|------|---------|----------|---------|--|----------------------------|------------------------------------|-------------------------------------|--|--|
|                                  |    | R | (0.60)  | (0.80)  | (0.77)  |      |         |        |      |         |          |         |  |                            |                                    |                                     |  |  |
|                                  |    |   | -0.11   | -0.10   | -0.17   |      |         |        |      |         |          |         |  |                            |                                    |                                     |  |  |
|                                  |    |   | (0.49)  | (0.67)  | (0.72)  |      |         |        |      |         |          |         |  |                            |                                    |                                     |  |  |
| Number of taps                   | IP | L | 55.25   | 48.29   | 43.53   | 0.22 | 5.55**  | 0.06   | 1.56 | 42.98** | 906.45** | 58.51** |  |                            |                                    |                                     |  |  |
|                                  |    | R | 55.74   | 48.95   | 44.42   |      |         |        |      |         |          |         |  |                            |                                    |                                     |  |  |
|                                  |    |   | (9.66)  | (14.04) | (13.52) |      |         |        |      |         |          |         |  |                            |                                    |                                     |  |  |
|                                  | AP | L | 42.15   | 30.97   | 27.14   |      |         |        |      |         |          |         |  | L < R <sup>b</sup>         | YA, YOA, OOA: AP < IP <sup>a</sup> | IP, AP: OOA < YOA < YA <sup>a</sup> |  |  |
|                                  |    | R | 42.78   | 31.77   | 27.64   |      |         |        |      |         |          |         |  |                            |                                    |                                     |  |  |
|                                  |    |   | (10.27) | (9.19)  | (8.83)  |      |         |        |      |         |          |         |  |                            |                                    |                                     |  |  |
| Ave of tap intervals (s)         | IP | L | 0.28    | 0.34    | 0.38    | 1.48 | 20.41** | 2.92   | 2.40 | 15.75** | 370.25** | 49.93** |  |                            |                                    |                                     |  |  |
|                                  |    | R | 0.27    | 0.34    | 0.38    |      |         |        |      |         |          |         |  |                            |                                    |                                     |  |  |
|                                  |    |   | (0.05)  | (0.11)  | (0.16)  |      |         |        |      |         |          |         |  |                            |                                    |                                     |  |  |
|                                  | AP | L | 0.37    | 0.51    | 0.59    |      |         |        |      |         |          |         |  | R < L <sup>b</sup>         | YA, YOA, OOA: IP < AP <sup>a</sup> | IP, AP: YA < YOA < OOA <sup>a</sup> |  |  |
|                                  |    | R | 0.37    | 0.50    | 0.59    |      |         |        |      |         |          |         |  |                            |                                    |                                     |  |  |
|                                  |    |   | (0.09)  | (0.14)  | (0.22)  |      |         |        |      |         |          |         |  |                            |                                    |                                     |  |  |
| Frequency of taps (Hz)           | IP | L | 3.73    | 3.25    | 2.95    | 0.49 | 5.08**  | 0.67   | 1.34 | 39.06** | 896.61** | 57.89** |  |                            |                                    |                                     |  |  |
|                                  |    | R | 3.76    | 3.30    | 3.00    |      |         |        |      |         |          |         |  |                            |                                    |                                     |  |  |
|                                  |    |   | (0.65)  | (0.94)  | (0.90)  |      |         |        |      |         |          |         |  |                            |                                    |                                     |  |  |
|                                  | AP | L | 2.86    | 2.11    | 1.86    |      |         |        |      |         |          |         |  | L < R <sup>b</sup>         | YA, YOA, OOA: AP < IP <sup>a</sup> | IP, AP: OOA < YOA < YA <sup>a</sup> |  |  |
|                                  |    | R | 2.89    | 2.16    | 1.88    |      |         |        |      |         |          |         |  |                            |                                    |                                     |  |  |
|                                  |    |   | (0.66)  | (0.98)  | (0.96)  |      |         |        |      |         |          |         |  |                            |                                    |                                     |  |  |
|                                  |    |   | (0.66)  | (0.58)  | (0.56)  |      |         |        |      |         |          |         |  |                            |                                    |                                     |  |  |
|                                  |    |   | (0.69)  | (0.62)  | (0.59)  |      |         |        |      |         |          |         |  |                            |                                    |                                     |  |  |
| SD of inter-tapping interval (s) | IP | L | 0.03    | 0.04    | 0.04    | 2.27 | 17.72** | 8.50** | 1.33 | 58.23** | 116.38** | 40.12** |  |                            |                                    |                                     |  |  |
|                                  |    | R | 0.02    | 0.03    | 0.04    |      |         |        |      |         |          |         |  |                            |                                    |                                     |  |  |
|                                  |    |   | (0.02)  | (0.03)  | (0.03)  |      |         |        |      |         |          |         |  |                            |                                    |                                     |  |  |
|                                  | AP | L | 0.04    | 0.08    | 0.10    |      |         |        |      |         |          |         |  | IP, AP: R < L <sup>a</sup> | YOA, OOA: IP < AP <sup>a</sup>     | IP: YA < YOA, OOA <sup>a</sup>      |  |  |
|                                  |    | R | 0.03    | 0.06    | 0.08    |      |         |        |      |         |          |         |  |                            | L, R: IP < AP <sup>a</sup>         | AP: YA < YOA < OOA <sup>a</sup>     |  |  |
|                                  |    |   | (0.02)  | (0.06)  | (0.07)  |      |         |        |      |         |          |         |  |                            |                                    |                                     |  |  |
|                                  |    |   | (0.02)  | (0.04)  | (0.07)  |      |         |        |      |         |          |         |  |                            |                                    |                                     |  |  |

Ave: Average; SD: Standard deviation; S: Second; IP: In-phase; AP: Anti-phase; L: left; R: Right; IE: Interaction effect; ME: Main effect; YA: Young adult; YOA: Young-old adult; OOA: Old-old adult; F: F-value; a: Post-hoc test of interaction effect; b: Post-hoc test of main effect; \*  $p < 0.05$ ; \*\*  $p < 0.01$ .

284

**Table 3.** Comparison of In-phase and Anti-phase tasks at Phase difference

| Task                            | YA<br>(n = 97) | YOA<br>(n = 102) | OOA<br>(n = 222) | IE                 | ME      | ME     | Post-hoc test                     |                                       |
|---------------------------------|----------------|------------------|------------------|--------------------|---------|--------|-----------------------------------|---------------------------------------|
|                                 |                |                  |                  | Task<br>×<br>Group | Task    | Group  | Task                              | Group                                 |
|                                 |                |                  |                  |                    |         |        |                                   |                                       |
| SD of phase difference (degree) | 29.60          | 27.27            | 29.03            | 14.57**            | 14.18** | 7.97** | YOA, OOA:<br>IP < AP <sup>a</sup> | AP: YA<br>< YOA<br>< OOA <sup>a</sup> |
|                                 | (14.17)        | (17.77)          | (22.73)          |                    |         |        |                                   |                                       |
|                                 | 25.88          | 33.21            | 40.57            |                    |         |        |                                   |                                       |
|                                 | (12.01)        | (16.13)          | (22.12)          |                    |         |        |                                   |                                       |

285  
286  
287

Phase difference: Phase difference between left and right tapping; IP: In-phase; AP: Anti-phase; IE: Interaction effect; ME: Main effect; YA: Young adult; YOA: Young-old adult; OOA: Old-old adult; F: F-value; a: Post-hoc test of the interaction effect; b: Post-hoc test of the main effect; \*\*:  $p < 0.01$ .

288

#### 4. Discussion

289

This study aimed to clarify age-related changes in bimanual coordination by comparing the performance of young, young-old, and old-old adults on bimanual coordination tasks. The results showed that the performance on the bimanual coordination task was lower in the older adult group than in the young adult group. In particular, the number and frequency of taps decreased, while the average tap interval increased in the following order: young adults, young-old adults, and old-old adults. On the other hand, the average local maximum distance and the standard deviation of local maximum distance increased more in the older adult group than in the young adult group, but remained consistent between the young-old and old-old adult groups. Furthermore, the performance of the anti-phase task was lower than that of the in-phase task, and the left-hand performance was lower than that of the right hand. These results suggest that the number of taps, mean tap interval, and frequency of taps are potential tools for assessing age-related changes in bimanual coordination.

302

##### 4.1. Comparison of Young Adults, Young-Old Adults, Old-Old Adults

303

In this study, the performance of bimanual coordination tasks was compared among young, young-old, and old-old adult groups. The parameters were categorized into those that changed with aging among the young adult, young-old adult, and old-old adult groups, and those that showed differences between the young adult and older adult groups but no difference between the young-old adult and old-old adult groups.

308

The number and frequency of taps decreased in the order of young adult, young-old adult, and old-old adult groups during both in-phase and anti-phase tasks. Conversely, the average tap intervals increased in the order of young adult, young-old adult, and old-old adult groups during both the in-phase and anti-phase tasks. This indicates that aging is associated with a reduction in the number of taps and an increase in the time required for a single-tapping action. A study comparing bimanual performance between young and young-old adults reported that the young-old adult group exhibited a reduction in the number of finger taps and an extension of movement time, leading to a decline in task performance compared to the young adult group [13]. Furthermore, in a bimanual force regulation task, aging was found to increase performance errors, leading to a de-

317

318 cline in the ability to control coordinated forces with both hands in young, young-old,  
319 and old-old adult group [25]. In summary, aging appears to impair bimanual coordina-  
320 tion and reduce both movement quantity and accuracy. Consequently, it is possible that,  
321 in this study, the number of taps decreased and the time required for a single-tapping  
322 action increased in the order of young adults, young-old adults, and old-old adults. Ad-  
323 ditionally, interhemispheric interactions via the corpus callosum play a crucial role in  
324 bimanual coordination [26], and age-related structural and functional changes in the  
325 corpus callosum have been reported to impair bimanual performance [27, 28]. These  
326 findings suggest that the performance of bimanual coordination tasks declined sequen-  
327 tially from the young adult group to the young-old adult group to the old-old adult  
328 group, potentially because of age-related impairments in the interaction between the left  
329 and right cerebral hemispheres.

330 The standard deviation of the inter-tap intervals increased during the anti-phase  
331 task in the following order: young adult, young-old adult, and old-old adult. This indi-  
332 cates that the variability in the time required for a single tapping action during an an-  
333 ti-phase task increases with age. Previous studies examining age-related changes in bi-  
334 manual force control during in- and anti-phase tasks have reported greater variability in  
335 the time taken to exert the specified force among older adults compared with young  
336 adults, with a particularly pronounced decline in performance during anti-phase tasks  
337 compared with in-phase tasks [14]. Furthermore, age-related impairments in  
338 neuromodulation in the brain can lead to random activation of neurons, resulting in in-  
339 creased intraindividual performance variability [29]. Therefore, in addition to changes in  
340 motor performance due to task difficulty, increased variability in motor performance  
341 resulting from age-related impairments in neural regulation within the brain led to a  
342 progressive increase in the standard deviation of the inter-tap interval from the young  
343 adult group to the young-old adult group and from the young-old adult group to the  
344 old-old adult group. Similarly, the standard deviation of phase differences during the  
345 anti-phase task increased in the order of the young adult, young-old adult, and old-old  
346 adult groups. This indicated that the timing discrepancy between the tapping move-  
347 ments of the right and left hands increased with age. The accuracy of bimanual coordi-  
348 nation declines in older adults compared with young adults [11]. Additionally, a study  
349 on nerve conduction velocity in the peripheral nervous system, spanning ages 20 to 103  
350 years, revealed a linear decrease in the average conduction velocity with age in both  
351 males and females [30]. In this study, it is possible that the peripheral nerve conduction  
352 velocity declined with age. Consequently, the timing discrepancy in tapping movements  
353 between the right and left hands likely increased in the order of the young, early elderly,  
354 and late elderly groups. Furthermore, Rhythmic bimanual coordination stability is in-  
355 fluenced by neural crosstalk, movement amplitude, and conduction time delays [31].  
356 Therefore, peripheral nerve conduction velocity may have declined with age in this study.  
357 In summary, the age-related decline in peripheral nerve conduction velocity may have  
358 impaired rhythmic bimanual coordination, resulting in a progressive increase in the  
359 standard deviation of the phase difference from the young adult group to the young-old  
360 adult group, and from the young-old adult group to the old-old adult group. In this  
361 study, differences between the groups in the standard deviations of the inter-tap inter-  
362 vals and phase differences were observed only during the anti-phase task. The supple-  
363 mentary motor area plays a crucial role in the bilateral motor control during bimanual  
364 coordination. Previous studies have shown that in healthy young adults, activity in the  
365 supplementary motor area is more prominent during anti-phase movements than during  
366 in-phase movements. However, motor facilitation connectivity within cortical motor  
367 networks, including the supplementary motor area, decreases with age [32, 33]. These  
368 findings suggest that decreased activity of the supplementary motor area involved in  
369 anti-phase movements due to aging may have caused the observed differences in the  
370 variability of single-tap movements and interhand coordination, specifically in the an-  
371 ti-phase task, among young adults, young adults, and old-old adults.

372 The average local maximum distances significantly increased in the young-old and  
373 old-old adult groups compared to the young adult group during both the in-phase and  
374 anti-phase tasks. This indicates that the opening width between the thumb and index  
375 finger increased in the older adult group compared to the young adult group, regardless  
376 of task difficulty. Motor control in bimanual coordination declines with age, and accu-  
377 racy decreases in older adults compared to young adults [11]. Additionally, working  
378 memory, which is the ability to temporarily store and actively process information to  
379 achieve specific goals, has been reported to decline with age [34]. In the bimanual coor-  
380 dination task used in this study, the participants were instructed to maintain a finger  
381 separation width of 40 mm between the thumb and index finger and were required to  
382 perform the tasks while preserving this interval. Therefore, in this study, the decline in  
383 working memory due to aging may have prevented participants from maintaining a  
384 consistent distance between the thumb and index finger, leading to an increase in the  
385 average local maximum distance in the older adult group compared with the young  
386 adult group.

387 The standard deviation of the local maximum distances increased in the right hand  
388 for the young-old and old-old adult groups compared to the young adult group. This  
389 indicated that the variability in the opening width of the fingers was greater in the older  
390 adult group than in the young adult group for the right hand. Bimanual coordination  
391 variability has been reported to be higher in older adults than in young adults [11].  
392 Moreover, proprioception in the fingers declines with age. Older adults show longer  
393 proprioceptive reaction times and reduced position sense than younger adults [35]. It is  
394 possible that the age-related decline in position sense made it difficult for older adults to  
395 consistently maintain the opening width of their fingers. Thus, the variability in finger-  
396 opening width during the bimanual coordination task may have been greater in the  
397 older adult group than in the younger adult group. Additionally, studies on unilateral  
398 and bilateral upper limb targeting tasks have shown that the task accuracy is generally  
399 higher for the right hand than for the left hand [36]. Therefore, the variability in the  
400 opening width of the fingers during bimanual coordination tasks may have been reduced  
401 in the dominant right hand compared to the non-dominant left hand. These findings  
402 suggest that the standard deviation of the local maximum distances was larger in the  
403 older adult group than in the young adult group for the right hand.

404 The standard deviation of inter-tap intervals increased in the in-phase task for the  
405 young-old and old-old adult groups compared with the young adult group. This indi-  
406 cates that the variability in the time required for a single-tapping action was greater in the  
407 older adult group than in the young adult group during the in-phase task. Previous  
408 studies have reported that motor performance in bimanual coordination declines signif-  
409 icantly in older adults compared to young adults [13, 14]. Additionally, older adults ex-  
410 hibit a trade-off between movement frequency and motor control accuracy. They tended  
411 to compensate for the reduced accuracy by decreasing the frequency of bimanual coor-  
412 dination movements [13]. In this study, tapping frequency, which represents the fre-  
413 quency of single-tapping actions, decreased in the following order: young adults,  
414 young-old adults, and old-old adults. However, the standard deviation of inter-tap in-  
415 tervals, representing variability in the time required for a single-tapping action, increased  
416 in the older adult group compared with that in the young adult group. Moreover, in this  
417 study, the slope of the approximate line of the local maximum points, which reflects fat-  
418 igue, decreased more during the anti-phase task than during the in-phase task. This  
419 suggests that fatigue develops more easily in the in-phase task than in the antiphase task.  
420 Additionally, the number of taps performed by the older adult group was higher in the  
421 in-phase than in the anti-phase task. Thus, it is possible that in older adults, the increased  
422 number of taps during the in-phase task compared to the anti-phase task led to greater  
423 fatigue, which in turn resulted in increased variability in the time required for a sin-  
424 gle-tapping action. These findings suggest that the standard deviation of the intertap in-  
425 terval may have been higher in older adults than in young adults during in-phase tasks.

426 In summary, this study demonstrated that the performance on bimanual coordina-  
427 tion tasks declines in older adults compared to young adults. The average of local max  
428 imum distances and standard deviation of local maximum distances, which reflect the distance  
429 of the bimanual coordination task, were greater in the older adult group than in the  
430 young adult group. Furthermore, among older adults, the number and frequency of taps  
431 decreased in the following order: young, young-old, and old-old. Conversely, the average  
432 tap intervals increased in the following order: young adults, young-old adults, and  
433 old-old adults. These findings suggest that the number of taps, average tap intervals, and  
434 the frequency of taps, which reflect the speed of bimanual coordination, could serve as  
435 useful indicators for assessing age-related changes in bimanual coordination perfor-  
436 mance among young, young-old, and old-old adults.

#### 437 **4.2. Comparison of the In-phase and the Anti-phase tasks**

438 In this study, the total traveling distance, number of taps, and frequency of taps de-  
439 creased during the anti-phase task compared to the in-phase task among young,  
440 young-old, and old-old adults. Conversely, the average local maximum distance and the  
441 average tap intervals increased during the anti-phase task compared with the in-phase  
442 task among young adults, young-old adults, and old-old adults. This indicates that, re-  
443 gardless of the participants' age, the amount of hand movement and the number of taps  
444 decreased during the anti-phase task compared to the in-phase task, whereas the time  
445 required for a single tap and the range of hand opening increased during the anti-phase  
446 task compared to the in-phase task. In the in-phase task, the tapping movements of the  
447 thumb and index finger were performed with both hands, and in the anti-phase task, the  
448 tapping movements were alternated between the left and right hands. The anti-phase  
449 task requires different movements of the left and right hands, making it more challenging  
450 than the in-phase task. Consequently, bimanual coordination performance is expected to  
451 decline in the anti-phase task compared to the in-phase task. It has been shown that bi-  
452 manual motor impairments increase during asymmetrical bimanual tasks like the an-  
453 ti-phase task compared to symmetrical tasks like the in-phase task, and these impair-  
454 ments are more pronounced in older adults than in young adults [12]. Research on be-  
455 havioral principles in inter-limb and hand-foot coordination has reported that during  
456 anti-phase movements, interference from one hand's movement affects the other hand's  
457 movement, resulting in spatial and temporal constraints. As the frequency of anti-phase  
458 movements increases, there is a tendency to shift toward in-phase movements for sym-  
459 metry [37]. In other words, in the in-phase task, the movements of one hand likely facil-  
460 itated the movements of the other hand, enhancing performance in the bimanual coordi-  
461 nation task. In contrast, in the anti-phase task, the movements of one hand may inter-  
462 fere with those of the other, leading to reduced performance in the bimanual coordina-  
463 tion task. Indeed, in this study, the number and frequency of taps increased in the less  
464 demanding in-phase task and decreased in the more demanding anti-phase task. Thus,  
465 the performance of bimanual coordination tasks appears to depend on task difficulty.  
466 This suggests that both the young adult and older adult groups in this study likely experi-  
467 enced a decline in performance during the anti-phase task compared to the in-phase  
468 task. Furthermore, it has also been reported that in young adults, the greater the micro-  
469 structural integrity in the midbrain regions, the better the motor performance in tasks  
470 requiring interactions between the cerebral hemispheres [38]. Additionally, compared  
471 with young adults, older adults tend to have smaller anterior fibers of the corpus callo-  
472 sum and poorer performance on anti-phase bimanual coordination tasks [39]. These  
473 findings suggest that in addition to task difficulty, the reduced amount of movement and  
474 number of taps observed during the anti-phase task in this study may be influenced by  
475 the structural integrity of the corpus callosum fibers in young and older adults, particu-  
476 larly in tasks requiring alternating bimanual coordination.

477 Furthermore, in this study, the standard deviation of the inter-tap interval increased  
478 during the anti-phase task compared with the in-phase task for both the left and right

479 hands. This indicates that the variability in the time required for a single-tapping  
480 movement was greater in the anti-phase task than in the in-phase task. It has been re-  
481 ported that the performance of bimanual coordination task—such as accuracy, variability,  
482 and execution time—decreases during asymmetrical tasks compared to symmetrical  
483 tasks [21, 39, 40]. Asymmetrical tasks are generally considered more challenging than  
484 symmetrical tasks. The standard deviation of the inter-tap interval, which is one of the  
485 parameters in this study, serves as an indicator of variability in bimanual coordination  
486 tasks. An in-phase task corresponds to a symmetrical task, whereas an anti-phase task  
487 corresponds to an asymmetrical task. These findings suggest that temporal variability in  
488 the time required for a single-tapping motion increased in the anti-phase task compared  
489 to the in-phase task because of the influence of task difficulty.

490 In addition, the standard deviations of the local maximum distance, inter-tap inter-  
491 val, and phase difference increased during the anti-phase task compared to the in-phase  
492 task in both the young-old and old-old adult groups. This indicates that, in the older  
493 adult group, the variability in the range of hand opening, time required for a sin-  
494 gle-tapping movement, and timing discrepancies between the hands were greater during  
495 the anti-phase task than during the in-phase task. It has been reported that the variability  
496 in bimanual coordination increases with age, with older adults exhibiting more pro-  
497 nounced differences between in-phase and anti-phase tasks than younger adults. While  
498 no differences in the performance of bimanual coordination tasks were observed between  
499 the two tasks in young adults, older adults tended to experience reduced performance on  
500 the bimanual coordination task during the anti-phase task compared to the in-phase task  
501 [39]. This suggests that the reduction in corpus callosum size and the decline in its mi-  
502 crostructural integrity with aging may have led to an increase in the standard deviation  
503 of local maximum distance, standard deviation of inter-tap interval, and standard devia-  
504 tion of phase difference in the older adult group during the anti-phase task compared  
505 with the in-phase task, but not in the young adult group. This indicates that older adults'  
506 performance on bimanual coordination tasks tends to be more dependent on task diffi-  
507 culty than younger adults. It is also more prone to decline during high-difficulty  
508 antiphase tasks, which require greater interhemispheric interactions.

509 On the other hand, the slope of the approximate line of the local maximum points  
510 decreased in the right hand during the anti-phase task compared to the in-phase task.  
511 This indicated that the anti-phase task was less influenced by fatigue than the in-phase  
512 task. Indeed, in this study, the number and frequency of taps decreased, while the aver-  
513 age tap interval increased during the anti-phase task compared to the in-phase task. In  
514 other words, the in-phase task involved shorter tap intervals and a higher number of taps  
515 than the anti-phase task, which may have made it more prone to fatigue. A study com-  
516 paring maximal grip strength and endurance between the dominant and nondominant  
517 hands reported that while the dominant hand exhibited greater absolute strength, it was  
518 more susceptible to early fatigue [41]. Furthermore, it has been noted that the muscle fi-  
519 ber composition in the fingers of the dominant hand includes a significantly higher  
520 proportion of Type II fibers, which excel in rapid force generation, compared to Type I  
521 fibers, which are better suited for endurance [42]. These findings suggest that the reduced  
522 endurance of the dominant right hand resulted in a decreased slope of the approximate  
523 line of local maximum points during the anti-phase task compared to the in-phase task.

524 In summary, this study revealed that the performance on bimanual coordination  
525 tasks declined during the anti-phase task compared to the in-phase task. The number of  
526 bimanual coordination tasks decreased during the anti-phase task among all age groups,  
527 including young, young-old, and old-old adults. In contrast, spatial and temporal varia-  
528 bility in bimanual coordination tasks was greater in the anti-phase task than in the  
529 in-phase task only in the older adult group. These findings suggest that the performance  
530 of bimanual coordination tasks may decrease during the anti-phase task compared to the  
531 in-phase task among young, young-old, and old-old adults. Furthermore, spatial and

532 temporal variability in bimanual coordination tasks tended to increase more prominently  
533 in young-old and old-old adults than in young adults.

### 534 4.3. Comparison of the Left hand and Right hand

535 In this study, the total traveling distance, number of taps, and frequency of taps  
536 were lower for the left hand than for the right hand. However, the standard deviation of  
537 the local maximum distance, average of tap intervals, and standard deviation of the  
538 intertap interval were higher for the left hand than for the right hand. This indicates that  
539 the left hand has less finger movement compared to the right hand and shows greater  
540 variability in the distance between the thumb and index finger, as well as in the time  
541 required for each tapping motion compared to the right hand. Repetitive movement tasks  
542 may have been suggested to induce changes in activity within the motor cortex, a phe-  
543 nomenon known as use-dependent plasticity [43]. Research on handgrip strength and  
544 finger dexterity between the dominant and non-dominant hands has reported signifi-  
545 cantly stronger grip strength and higher finger dexterity in the dominant hand than in  
546 the non-dominant hand [44]. Notably, all the participants in this study were right-handed.  
547 Therefore, it is possible that use-dependent plasticity resulted in lower performance in  
548 the left hand than in the right hand across many parameters in the bimanual coordination  
549 task. Furthermore, the total traveling distance was lower in the left hand than in the right  
550 hand in the old-old adult group. This indicates that finger movement in the old-old adult  
551 group was lower in the left hand than in the right hand. It has been reported that finger  
552 usage of the dominant hand increases with age compared with that of the non-dominant  
553 hand [45]. Therefore, age-related increases in finger usage might have caused a left-right  
554 difference in finger movement in the old-old adult group, the oldest age group. These  
555 findings suggest that bimanual coordination performance may be lower in the older  
556 adult group than in the young adult group and lower in the non-dominant left hand than  
557 in the dominant right hand.

558 Next, the standard deviation of the inter-tap interval was higher for the left hand  
559 than for the right hand for both the in-phase and anti-phase tasks. This indicated that the  
560 variability in the time required for a single tapping movement was greater in the left  
561 hand, regardless of the task type. In general, right-handed individuals exhibit higher  
562 manual dexterity in their dominant hand than in their non-dominant [45]. Therefore, the  
563 standard deviation of the inter-tap interval, which represents temporal variability, in-  
564 creased in the non-dominant left hand compared with the dominant right hand owing to  
565 use-dependent plasticity.

566 Furthermore, the standard deviation of the local maximum distance was higher for  
567 the left hand than for the right hand across all age groups, including young, young-old,  
568 and old-old adults. This indicated that the variability in the distance required for a single  
569 tapping movement was greater in the left hand than in the right hand, regardless of age.  
570 A previous study that used tasks that required drawing in-phase and anti-phase circles  
571 with both hands reported that movement variability was lower in the dominant hand  
572 than in the non-dominant hand [46]. Therefore, the standard deviation of the local  
573 maximum distance, which represents spatial variability, is thought to have increased in  
574 the non-dominant left hand compared to the dominant right hand.

575 The slope of the approximate line of the local maximum points during the in-phase  
576 task was lower for the left than for the right hand. This indicated that the left hand expe-  
577 rienced less fatigue than the right hand during the in-phase task. The in-phase task was  
578 considered less challenging than the anti-phase task, and the increased movement during  
579 the task may have led to fatigue. A previous study reported that during tasks requiring  
580 simultaneous maximal force exertion with both hands, the dominant hand demonstrated  
581 a faster decline in force than the non-dominant hand [47]. In this study, the number and  
582 frequency of taps were lower in the left hand than in the right hand and were also lower  
583 during the anti-phase task than during the in-phase task. Similarly, the average tap in-  
584 tervals were higher in the left hand than in the right hand, and higher during the an-

585 ti-phase task than during the in-phase task. These results suggest that the right hand in  
586 the in-phase task may have been the most fatigued hand because it moved the most  
587 during the task.

588 In summary, it was revealed that the performance of bimanual coordination task  
589 was lower in the non-dominant left hand compared to the dominant right hand. Notably,  
590 unlike the young and young-old adult groups, the old-old adult group showed signifi-  
591 cantly less movement in the left hand than in the right hand during the bimanual coor-  
592 dination task. These findings suggest that the left-right difference in the amount of  
593 movement in bimanual coordination tasks may increase with age.

#### 594 4.4. Limitations

595 This study had some limitations. First, age-related changes in bimanual coordina-  
596 tion were examined only at the behavioral level, leaving the neural mechanisms in the  
597 brain unclear. Second, this study focused solely on age-related changes in bimanual co-  
598 ordination using tapping tasks, and its relationship with other physical and psycho-  
599 physiological functions remains uncertain. In recent years, bimanual coordination tasks  
600 have been increasingly used as screening tests for cognitive impairment, and it has been  
601 suggested that they may also be associated with other physical and psychological func-  
602 tions [48]. Therefore, future studies should aim to clarify the neural mechanisms involved  
603 in bimanual coordination and their relationship with other physical and psychophysio-  
604 logical functions, using techniques such as transcranial magnetic stimulation and elec-  
605 troencephalography.

#### 606 5. Conclusions

607 We clarified age-related changes in bimanual coordination by comparing the per-  
608 formance of bimanual coordination tasks among young, young-old, and old-old adults.  
609 The performance of bimanual coordination task was lower in the non-dominant left hand  
610 than in the dominant right hand during the more challenging anti-phase task compared  
611 to the less challenging in-phase task. Furthermore, the features of the bimanual coordi-  
612 nation task revealed parameters that showed minimal variations between young-old and  
613 old-old adults as well as among parameters that exhibited significant aging-related  
614 changes. Specifically, the number and frequency of taps decreased, whereas the average  
615 tap intervals increased in the following order: young, young-old, and old-old adults.  
616 These findings suggest that the number of taps, the average of tap intervals, and the  
617 frequency of taps may be useful as tools for assessing aging-related changes in bimanual  
618 coordination.

619 **Author Contributions:** Conceptualization, S.M. and H.N.; methodology, S.M. and H.N.; formal  
620 analysis, Y.S.; investigation, Y.S., S.M., A.G., S.S., S.F., R.Y. and H.N.; data curation, Y.S.; writ-  
621 ing—original draft preparation, Y.S.; writing—review and editing, Y.S., S.M., A.G., S.S., S.F.,  
622 R.Y., T.M., K.N. and H.N.; visualization, Y.S.; supervision, S.M. and H.N.; project administration,  
623 S.M. and H.N.; funding acquisition, S.M., T.M., K.N. and H.N. All authors have read and agreed to  
624 the published version of the manuscript.

625 **Funding:** This work was supported by JSPS KAKENHI (Grant Number: JP23K21578 to S.M.), JSPS  
626 KAKENHI (Grant Number: JP23K10417 to H.N.), JSPS KAKENHI (Grant Number: JP23K19907 to  
627 K.N.), JSPS KAKENHI (Grant Number: JP24K23764 to T.M.).

628 **Institutional Review Board Statement:** This study was conducted in accordance with the Declara-  
629 tion of Helsinki and approved by the Ethics Committee of Kyoto Tachibana University (approval  
630 number: 24-52; approval date: November 12, 2024). The study was registered in the UMIN Clinical  
631 Trials Registry (UMIN000056499).

632 **Informed Consent Statement:** Informed consent was obtained from all participants.



633 **Data Availability Statement:** The data supporting the findings of this study are available upon  
634 request from the corresponding author. The data are not publicly available because they contain  
635 information that can compromise the privacy of the research participants.

636 **Acknowledgments:** We would like to express our sincere gratitude to all the participants for their  
637 willingness to participate in this study. We gratefully acknowledge Mr. Tomohiko Mizuguchi at  
638 Maxell Ltd. for advice and suggestions regarding the analysis.

639 **Conflicts of Interest:** The authors declare no conflict of interest.

## 640 References

- 641 1. United Nations. *World Social Report 2023: Leaving No One Behind In An Ageing World*, United Nations: New York, USA, 2023; pp.  
642 17-75.
- 643 2. Miller, E.A.; Rosenheck, R.A.; Schneider, L.S. Caregiver burden, health utilities, and institutional service costs among com-  
644 munity-dwelling patients with Alzheimer disease. *Alzheimer Dis Assoc Disord* **2010**, *24*, 380-389. doi:  
645 10.1097/WAD.0b013e3181eb2f2e.
- 646 3. Cawthon, P.M.; Fox, K.M.; Gandra, S.R.; Delmonico, M.J.; Chiou, C.F.; Anthony, M.S.; Sewall, A.; Goodpaster, B.; Satterfield, S.;  
647 Cummings, S.R.; Harris, T.B. Health, Aging and Body Composition Study. Do muscle mass, muscle density, strength, and  
648 physical function similarly influence risk of hospitalization in older adults?. *J Am Geriatr Soc* **2009**, *57*, 1411-1419. doi:  
649 10.1111/j.1532-5415.2009.02366.x.
- 650 4. World Health Organization. *Decade of Healthy Ageing: Baseline Report*, World Health Organization: Geneva, Switzerland, 2020;  
651 pp. 1-27.
- 652 5. Eckstrom, E.; Neukam, S.; Kalin, L.; Wright, J. Physical Activity and Healthy Aging. *Clin Geriatr Med* **2020**, *36*, 671-683. doi:  
653 10.1016/j.cger.2020.06.009.
- 654 6. Kilbreath, S.L.; Heard, R.C. Frequency of hand use in healthy older persons. *Aust J Physiother* **2005**, *51*, 119-122. doi:  
655 10.1016/s0004-9514(05)70040-4.
- 656 7. Incel, N.A.; Sezgin, M.; As, I.; Cimen, O.B.; Sahin, G. The geriatric hand: correlation of hand-muscle function and activity re-  
657 striction in elderly. *Int J Rehabil Res* **2009**, *32*, 213-218. doi: 10.1097/MRR.0b013e3283298226.
- 658 8. Lin, C.H.; Chou, L.W.; Wei, S.H.; Lieu, F.K.; Chiang, S.L.; Sung, W.H. Influence of aging on bimanual coordination control. *Exp*  
659 *Gerontol* **2014**, *53*, 40-47. doi: 10.1016/j.exger.2014.02.005.
- 660 9. Murman, D.L. The Impact of Age on Cognition. *Semin Hear* **2015**, *36*, 111-121. doi: 10.1055/s-0035-1555115.
- 661 10. Rattanawan, P. Correlations between Hand Dexterity and Bimanual Coordination on the Activities of Daily Living in Older  
662 Adults with Mild Cognitive Impairment. *Dement Geriatr Cogn Dis Extra* **2022**, *12*, 24-32. doi: 10.1159/000521644.
- 663 11. Krehbiel, L.M.; Kang, N.; Cauraugh, J.H. Age-related differences in bimanual movements: A systematic review and me-  
664 ta-analysis. *Exp Gerontol* **2017**, *98*, 199-206. doi: 10.1016/j.exger.2017.09.001.
- 665 12. Kang, N.; Ko, D.K.; Cauraugh, J.H. Bimanual motor impairments in older adults: an updated systematic review and me-  
666 ta-analysis. *EXCLI J* **2022**, *21*, 1068-1083. doi: 10.17179/excli2022-5236.
- 667 13. Lee, T.D.; Wishart, L.R.; Murdoch, J.E. Aging, Attention, and Bimanual Coordination. *Can J Aging/Rev Can Vieillessement* **2002**,  
668 *21*, 549-557. doi:10.1017/S0714980800002087.
- 669 14. Rudisch, J.; Müller, K.; Kutz, D.F.; Brich L.; Sleimen-Malkoun R.; Voelcker-Rehage C. How Age, Cognitive Function and Gen-  
670 der Affect Bimanual Force Control. *Front Physiol* **2020**, *11*, 245. doi: 10.3389/fphys.2020.00245.
- 671 15. Chung, E.; Lee, S.H.; Lee, H.J.; Kim, Y.H. Comparative study of young-old and old-old people using functional evaluation, gait  
672 characteristics, and cardiopulmonary metabolic energy consumption. *BMC Geriatr* **2023**, *23*, 400. doi:  
673 10.1186/s12877-023-04088-6.
- 674 16. Hayashida, I.; Tanimoto, Y.; Takahashi, Y.; Kusabiraki, T.; Tamaki, J. Correlation between muscle strength and muscle mass,  
675 and their association with walking speed, in community-dwelling elderly Japanese individuals. *PLoS One* **2014**, *9*, e111810. doi:  
676 10.1371/journal.pone.0111810.
- 677 17. Kim, J.; Cha, E. Predictors of Cognitive Function in Community-Dwelling Older Adults by Age Group: Based on the 2017  
678 National Survey of Older Korean Adults. *Int J Environ Res Public Health* **2021**, *18*, 9600. doi: 10.3390/ijerph18189600.
- 679 18. Blais, M.; Martin, E.; Albaret, J.M.; Tallet, J. Preservation of perceptual integration improves temporal stability of bimanual  
680 coordination in the elderly: an evidence of age-related brain plasticity. *Behav Brain Res* **2014**, *275*, 34-42. doi:  
681 10.1016/j.bbr.2014.08.043.
- 682 19. Enokizono, T.; Ohto, T.; Tanaka, M.; Maruo, K.; Sano, Y.; Kandori, A.; Takada, H. Quantitative assessment of fine motor skills  
683 in children using magnetic sensors. *Brain Dev* **2020**, *42*, 421-430. doi: 10.1016/j.braindev.2020.03.004.
- 684 20. Tanaka, M.; Tsubouchi, M.; Kayashita, J.; Mizukami, K. [Factors associated with oral frailty among community-dwelling older  
685 people -A comparison between those <75 and ≥75 years old]. *Nihon Ronen Igakkai Zasshi* **2024**, *61*, 68-79. doi:  
686 10.3143/geriatrics.61.68.

- 687 21. Suzumura S., Osawa A, Kanada Y., Keisuke M., Takano E., Sugioka J., Natsumi M., Nagahama T., Shiramoto K., Kuno K.,  
688 Kizuka S., Satoh K., Sakurai H., Sano Y., Mizuguchi T., Kandori A, Kondo I. Finger tapping test for assessing the risk of mild  
689 cognitive impairment. *Hong Kong J Occup Ther* **2022**, *35*, 137-145. doi: 10.1177/15691861221109872.
- 690 22. Sugioka, J.; Suzumura, S.; Kuno, K.; Kizuka, S.; Sakurai, H.; Kanada, Y.; Mizuguchi, T.; Kondo, I. Relationship between finger  
691 movement characteristics and brain voxel-based morphometry. *PLoS One* **2022**, *17*, e0269351. doi:  
692 10.1371/journal.pone.0269351.
- 693 23. Sano, Y.; Kandori, A.; Shima, K.; Tamura, Y.; Takagi, H.; Tsuji, T.; Noda, M.; Higashikawa, F.; Yokoe, M.; Sakoda, S. Reliability  
694 of Finger Tapping Test Used in Diagnosis of Movement Disorders. 2011 5th International Conference on Bioinformatics and  
695 Biomedical Engineering, Wuhan, China, 10-12 May 2011.
- 696 24. Suzumura, S.; Kanada, Y.; Osawa, A.; Sugioka, J.; Maeda, N.; Nagahama, T.; Shiramoto, K.; Kuno, K.; Kizuka, S.; Sano, Y.;  
697 Mizuguchi, T.; Kandori, A.; Kondo, I. Assessment of finger motor function that reflects the severity of cognitive function. *Fujita*  
698 *Med J* **2021**, *7*, 122-129. doi: 10.20407/fmj.2020-013.
- 699 25. Hu, X.; Newell, K.M. Aging, visual information, and adaptation to task asymmetry in bimanual force coordination. *J Appl*  
700 *Physiol* (1985) **2011**, *111*, 1671-1680. doi: 10.1152/jappphysiol.00760.2011.
- 701 26. Gerloff, C.; Andres, F.G. Bimanual coordination and interhemispheric interaction. *Acta Psychol (Amst)* **2002**, *110*, 161-186. doi:  
702 10.1016/s0001-6918(02)00032-x.
- 703 27. Fling, B.W.; Seidler, R.D. Fundamental differences in callosal structure, neurophysiologic function, and bimanual control in  
704 young and older adults. *Cereb Cortex* **2012**, *22*, 2643-2652. doi: 10.1093/cercor/bhr349.
- 705 28. Fujiyama, H.; Van Soom, J.; Rens, G.; Gooijers, J.; Leunissen, I.; Levin, O.; Swinnen, S.P. Age-Related Changes in Frontal Net-  
706 work Structural and Functional Connectivity in Relation to Bimanual Movement Control. *J Neurosci* **2016**, *36*, 1808-1822. doi:  
707 10.1523/JNEUROSCI.3355-15.2016.
- 708 29. Li, S.C.; Lindenberger, U.; Sikström, S. Aging cognition: from neuromodulation to representation. *Trends Cogn Sci* **2001**, *5*,  
709 479-486. doi: 10.1016/s1364-6613(00)01769-1.
- 710 30. Verdú, E.; Ceballos, D.; Vilches, J.J.; Navarro, X. Influence of aging on peripheral nerve function and regeneration. *J Peripher*  
711 *Nerv Syst* **2000**, *5*, 191-208. doi: 10.1046/j.1529-8027.2000.00026.x.
- 712 31. Banerjee, A.; Jirsa, V.K. How do neural connectivity and time delays influence bimanual coordination?. *Biol Cybern* **2007**, *96*,  
713 265-278. doi: 10.1007/s00422-006-0114-4.
- 714 32. Wilson, T.W.; Kurz, M.J.; Arpin, D.J. Functional specialization within the supplementary motor area: a fNIRS study of bi-  
715 manual coordination. *Neuroimage* **2014**, *85*, 445-450. doi: 10.1016/j.neuroimage.2013.04.112.
- 716 33. Green, P.E.; Ridding, M.C.; Hill, K.D.; Semmler, J.G.; Drummond, P.D.; Vallence, A.M. Supplementary motor area-primary  
717 motor cortex facilitation in younger but not older adults. *Neurobiol Aging* **2018**, *64*, 85-91. doi:  
718 10.1016/j.neurobiolaging.2017.12.016.
- 719 34. Cansino, S.; Hernández-Ramos, E.; Estrada-Manilla, C.; Torres-Trejo, F.; Martínez-Galindo, J.G.; Ayala-Hernández, M.;  
720 Gómez-Fernández, T.; Osorio, D.; Cedillo-Tinoco, M.; Garcés-Flores, L.; Beltrán-Palacios, K.; García-Lázaro, H.G.;  
721 García-Gutiérrez, F.; Cadena-Arenas, Y.; Fernández-Apan, L.; Bärttschi, A.; Rodríguez-Ortiz, M.D. Decline in verbal and  
722 visuospatial working memory across adult lifespan. *Age (Dordr)* **2013**, *35*, 2283-2302. doi: 10.1007/s11357-013-9531-1.
- 723 35. Ingemanson, M.L.; Rowe, J.B.; Chan, V.; Wolbrecht, E.T.; Cramer, S.C.; Reinkensmeyer, D.J. Use of a robotic device to measure  
724 age-related decline in finger proprioception. *Exp Brain Res* **2016**, *234*, 83-93. doi: 10.1007/s00221-015-4440-4.
- 725 36. Mickevičienė, D.; Skurvydas, A.; Karanauskienė, D. Is intraindividual variability different between unimanual and bimanual  
726 speed-accuracy movements?. *Percept Mot Skills* **2015**, *120*, 125-138. doi: 10.2466/25.PMS.120v14x3.
- 727 37. Swinnen, S.P. Intermanual coordination: from behavioural principles to neural-network interactions. *Nat Rev Neurosci* **2002**, *3*,  
728 348-359. doi: 10.1038/nrn807.
- 729 38. Johansen-Berg, H.; Della-Maggiore, V.; Behrens, T.E.; Smith, S.M.; Paus, T. Integrity of white matter in the corpus callosum  
730 correlates with bimanual co-ordination skills. *Neuroimage* **2007**, *36*, 16-21. doi: 10.1016/j.neuroimage.2007.03.041.
- 731 39. Fling, B.W.; Walsh, C.M.; Bangert, A.S.; Reuter-Lorenz, P.A.; Welsh, R.C.; Seidler, R.D. Differential callosal contributions to  
732 bimanual control in young and older adults. *J Cogn Neurosci* **2011**, *23*, 2171-2185. doi: 10.1162/jocn.2010.21600.
- 733 40. Kiyama, S.; Kunimi, M.; Iidaka, T.; Nakai, T. Distant functional connectivity for bimanual finger coordination declines with  
734 aging: an fMRI and SEM exploration. *Front Hum Neurosci* **2014**, *8*, 251. doi: 10.3389/fnhum.2014.00251.
- 735 41. Nicolay, C.W.; Walker, A.L. Grip strength and endurance: Influences of anthropometric variation, hand dominance, and gen-  
736 der. *Int J Ind Ergon* **2005**, *35*, 605-618. doi: 10.1016/j.ergon.2005.01.007.
- 737 42. Józsa, L.; Demel, Z.; Vándor, E.; Réffy, A.; Szilágyi, I. Spezifische Faserzusammensetzung der menschlichen Hand- und  
738 Armmuskeln [Specific fibre composition of human hand and arm muscles]. *Handchirurgie* **1978**, *10*, 153-157.
- 739 43. Bütefisch, C.M.; Khurana, V.; Kopylev, L.; Cohen, L.G. Enhancing encoding of a motor memory in the primary motor cortex by  
740 cortical stimulation. *J Neurophysiol* **2004**, *91*, 2110-2116. doi: 10.1152/jn.01038.2003.
- 741 44. Hodges, L.; Adams, J. Grip Strength and Dexterity: A Study of Variance between Right- and Left-Handed Healthy Individuals.  
742 *The British Journal of Hand Therapy* **2007**, *12*, 15-21. doi:10.1177/175899830701200102.
- 743 45. Weller, M.P.; Latimer-Sayer, D.T. Increasing right hand dominance with age on a motor skill task. *Psychol Med* **1985**, *15*, 867-872.  
744 doi: 10.1017/s0033291700005109.

- 745 46. Zhou, G.; Chen, Y.; Wang, X.; Wei, H.; Huang, Q.; Li, L. The correlations between kinematic profiles and cerebral hemody-  
746 namics suggest changes of motor coordination in single and bilateral finger movement. *Front Hum Neurosci* **2022**, *16*: 957364.  
747 doi: 10.3389/fnhum.2022.957364.
- 748 47. Li, S.; Danion, F.; Latash, M.L.; Li, Z.; Zatsiorsky, V.M. Finger Coordination and Bilateral Deficit during Two-Hand Force  
749 Production Tasks Performed by Right-Handed Subjects. *J Appl Biomech* **2000**, *16*, 379-391. doi:10.1123/jab.16.4.379.
- 750 48. Tomita, Y.; Tanaka, S.; Takahashi, S.; Takeuchi, N. Detecting cognitive decline in community-dwelling older adults using  
751 simple cognitive and motor performance tests. *Geriatr Gerontol Int* **2020**, *20*, 212-217. doi: 10.1111/ggi.13863.
